# Supplementary material for: A CC-NBS-LRR gene induces hybrid lethality in cotton
Source: PubMed Central journal article supplement — J Exp Bot. 2019 Jul 3;70(19):5145–56. doi: 10.1093/jxb/erz312 (PMC6793457; doi:10.1093/jxb/erz312), 2019-07-03
Supplement: erz312_suppl_supplementary_figures_s1-s17.pdf [file erz312_suppl_supplementary_figures_s1-s17.pdf]

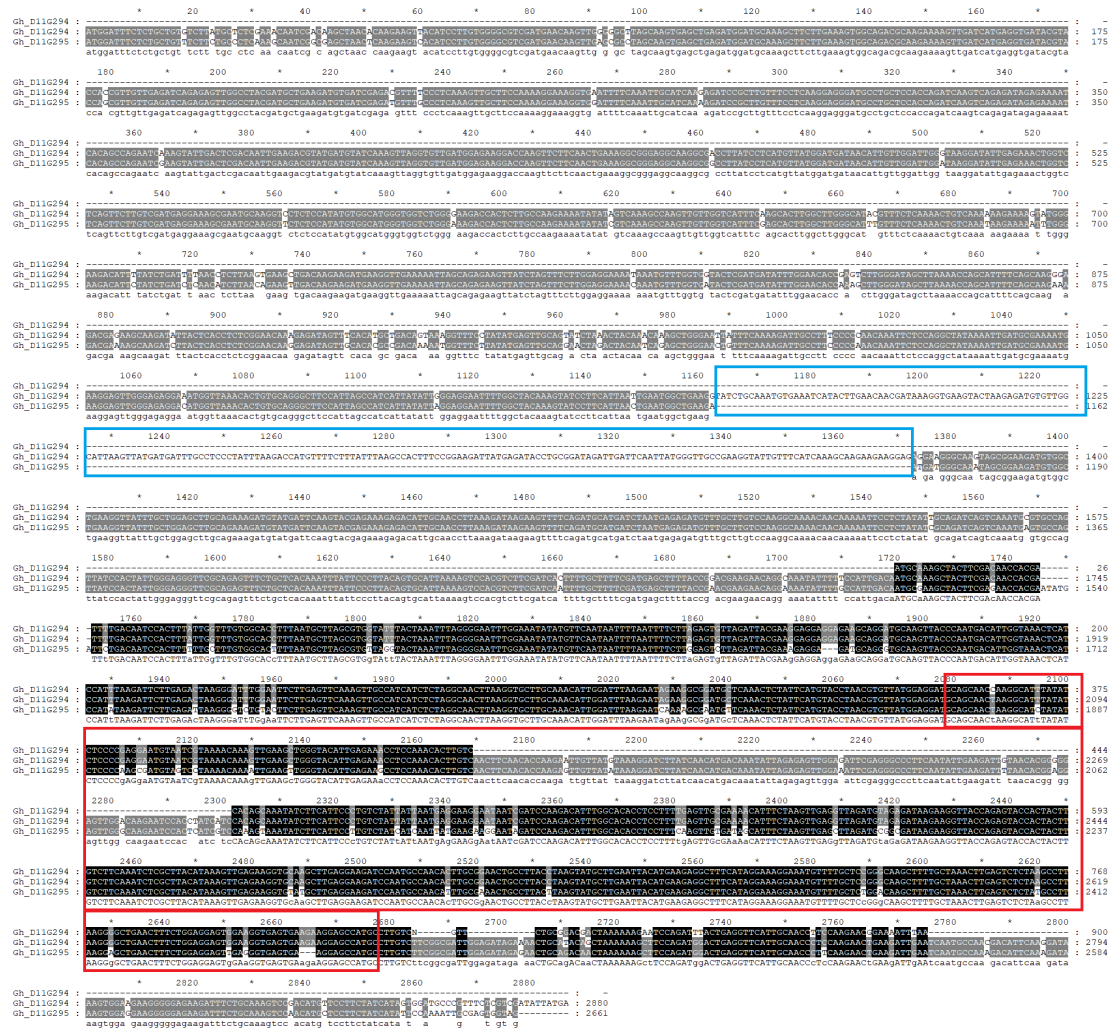

**Figure S1. Alignment of the sequences of *Gh\_D11G2948*, *Gh\_D11G2949* and *Gh\_D11G2950*.** Three candidate genes alignment showed that *Gh\_D11G2949* had a 216-bp sequence that *Gh\_D11G2948* and *Gh\_D11G2950* didn't have (blue grids). A co-owned 599-bp fragment (599-bp in *Gh\_D11G2949*, 587-bp in *Gh\_D11G2950* and 378-bp in *Gh\_D11G2948*) (red grids) been cloned into pTRV2, to silencing all three candidate genes.

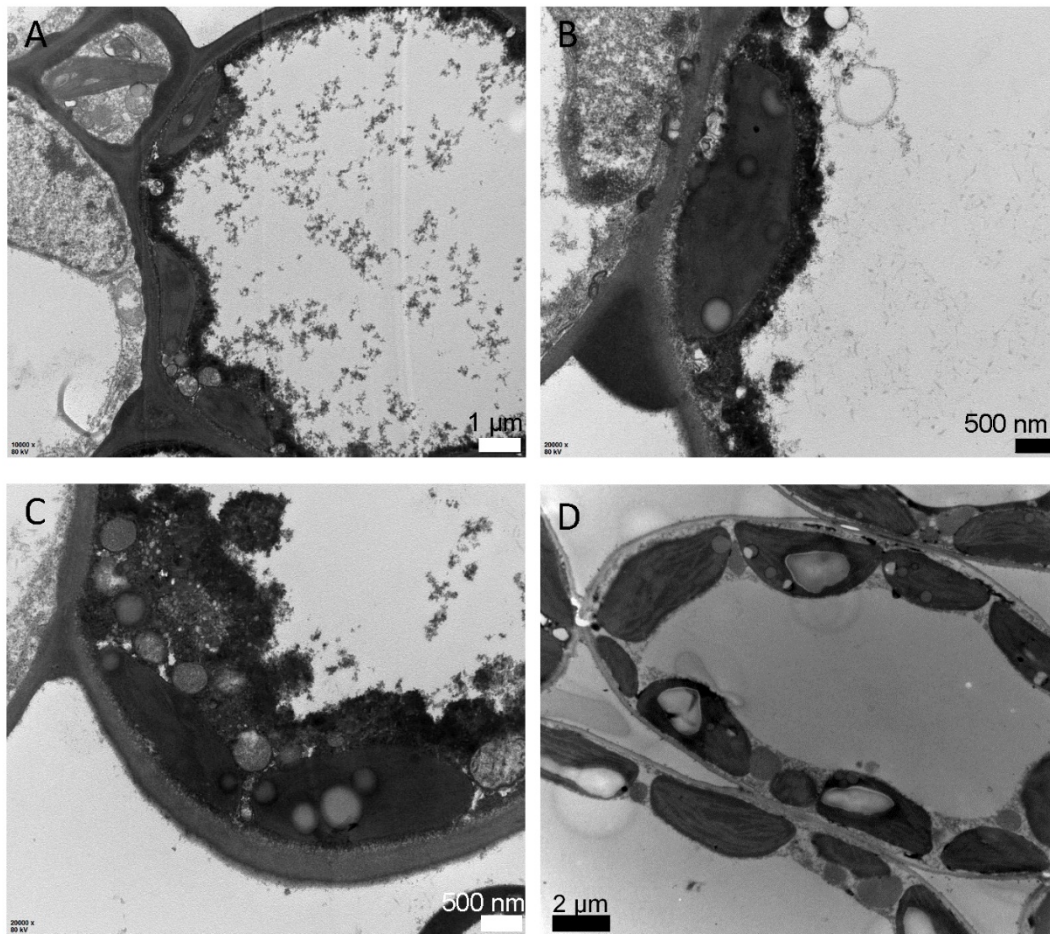

**Figure S2. Images of transmission electron microscope of lethal and normal F<sub>1</sub> leaves in S4.** Figure A, B and C were the images of cells of lethal F<sub>1</sub> leaves in S4; figure D was the image of cells of normal leaves in S4.

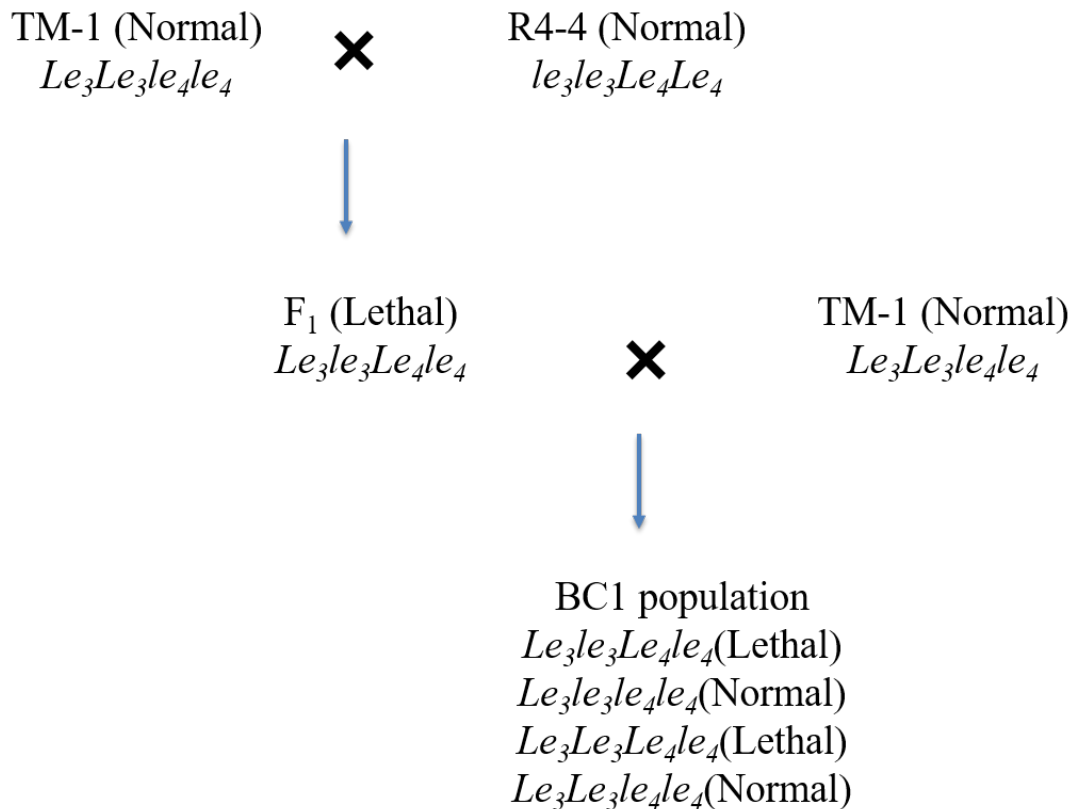

**Figure S3. Genotype of BC<sub>1</sub> population.** Parent line TM-1 contained  $Le_3Le_3le_4le_4$  genotype and normal phenotype. Parent line R4-4 contained  $le_3le_3Le_4Le_4$  genotype and normal type. When the cross generated F<sub>1</sub> progeny, the F<sub>1</sub> plants contained  $Le_3Le_4$  at same time, the phenotype were lethal. Use TM-1 as recurrent parent produced BC<sub>1</sub> population. There were four genotype and two phenotype in BC<sub>1</sub> population,  $Le_4$  locus from *G. barbadense* R4-4 were separated. Thus, we can use the BC<sub>1</sub> population to fine mapping the lethal gene  $Le_4$ .



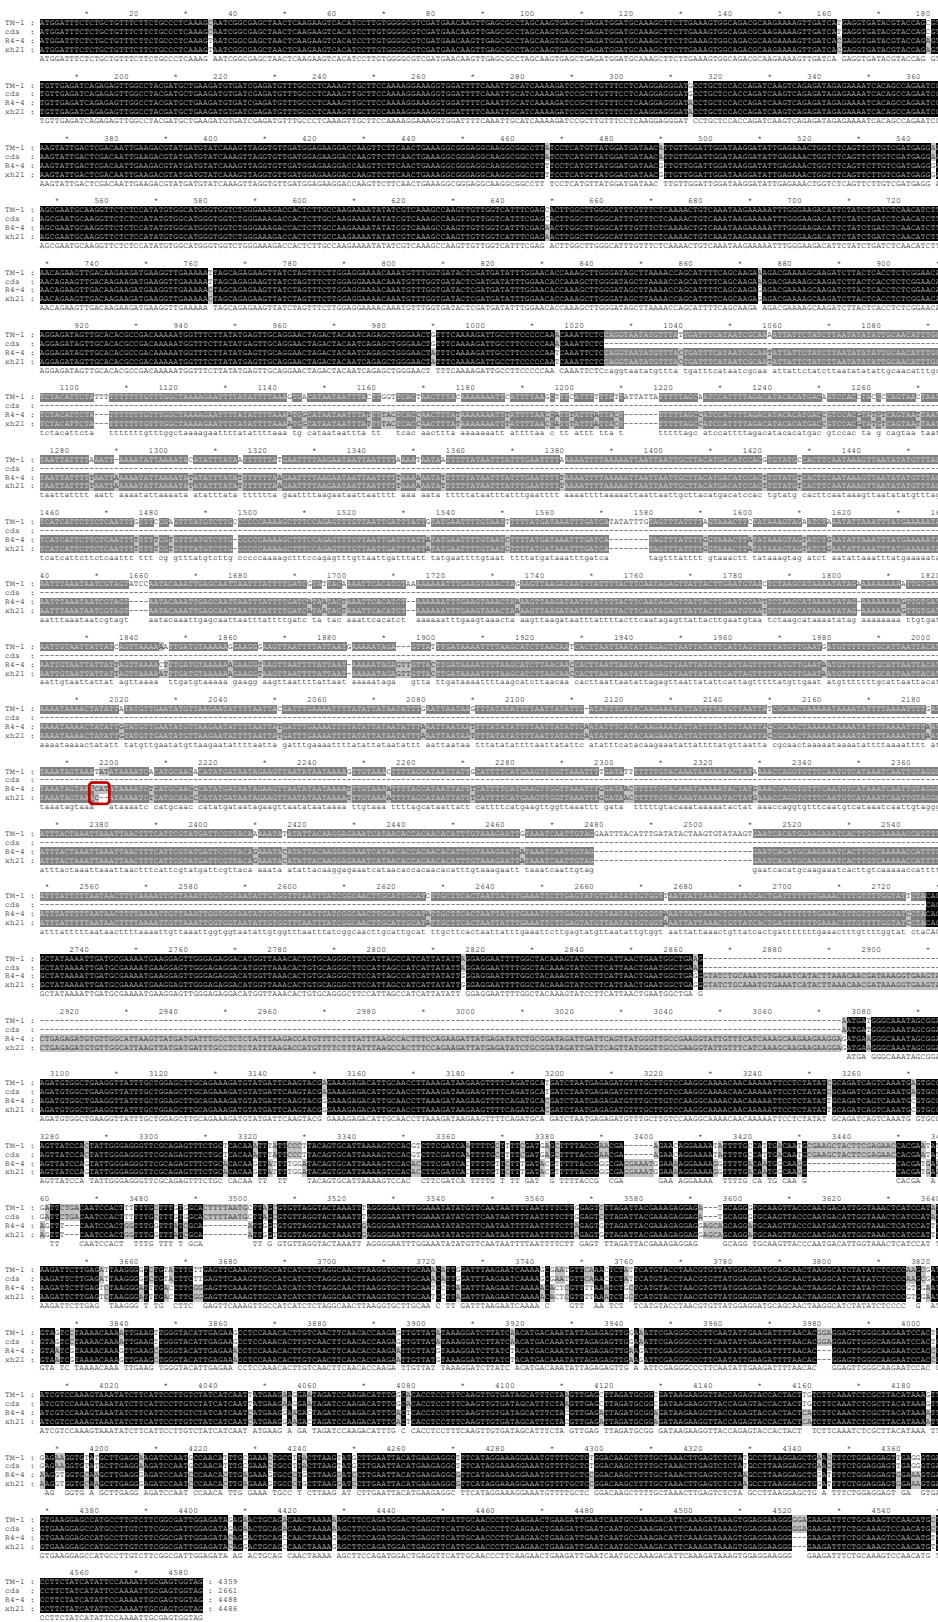

**Figure S5. Alignment of the sequences of *Gh\_D11G2950*.** Hybrid lethality *G. barbadense* parent line R4-4 only has two bases inserted in introns compare with hybrid normal *G. barbadense* parent line Xinhai21. No difference in amino acid sequence between two *G. barbadense* varieties.

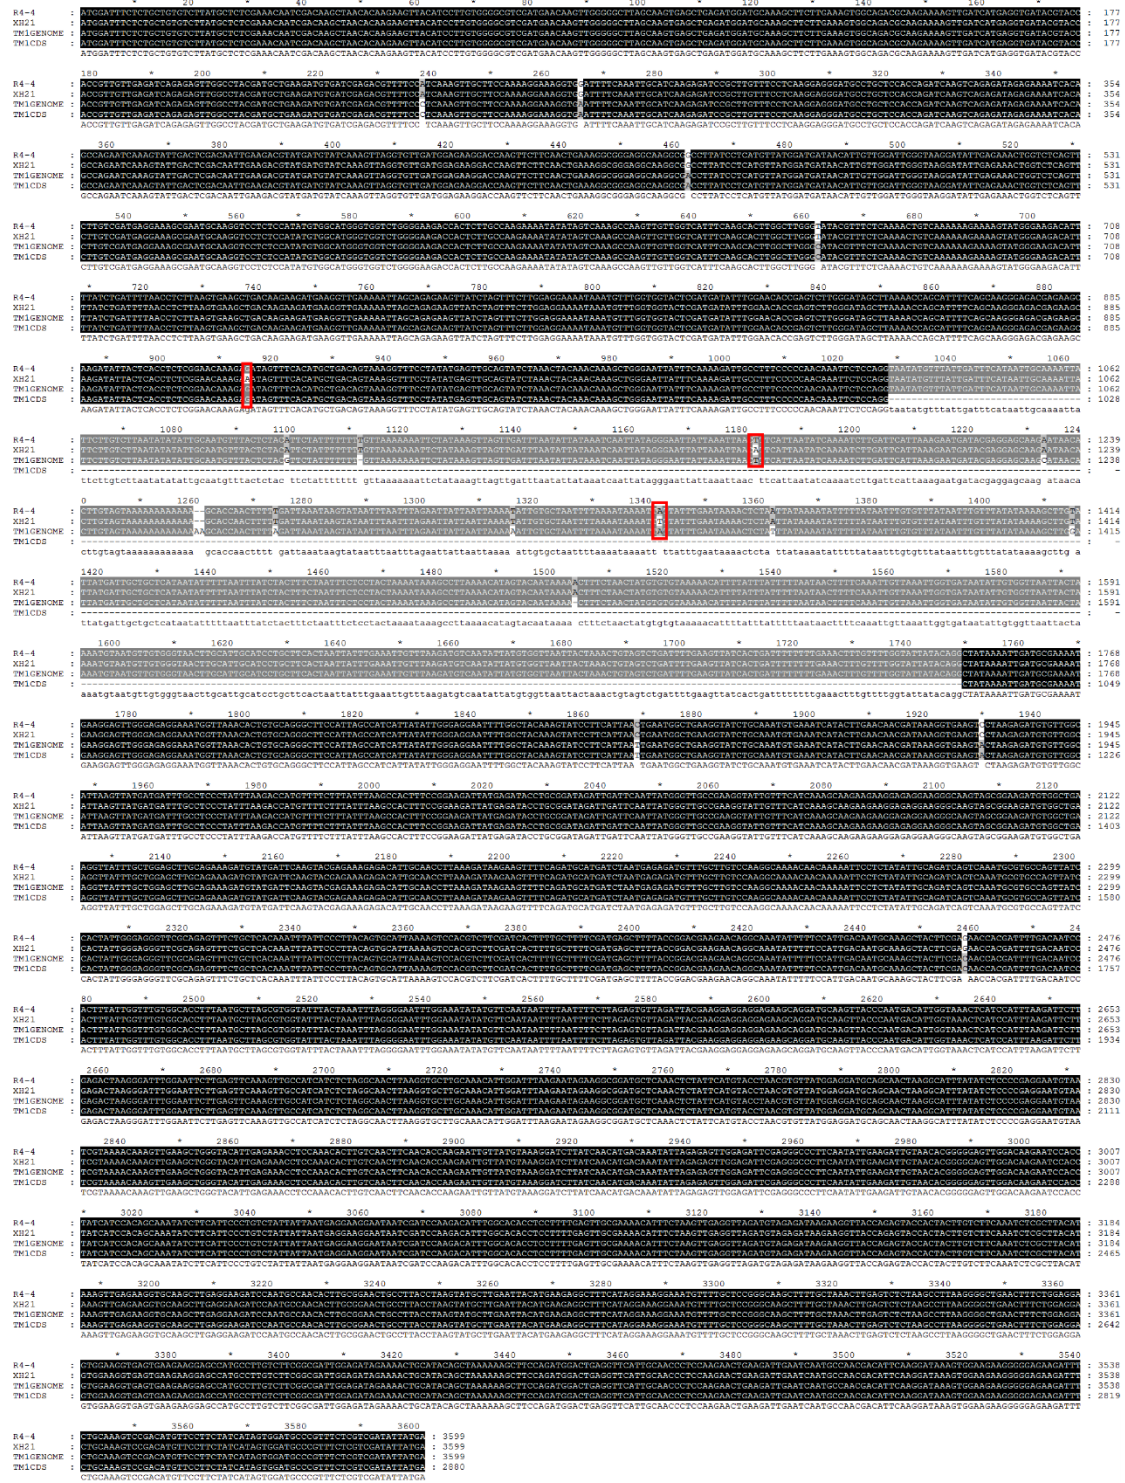

**Figure S6. Alignment of the sequences of *Gh\_D11G2949*.** Three SNPs in genome sequence between *G. barbadense* R4-4 and *G. barbadense* Xinhai21. One SNP was in exon region; two SNPs were in intron. No difference in amino acid sequence between two *G. barbadense* varieties.

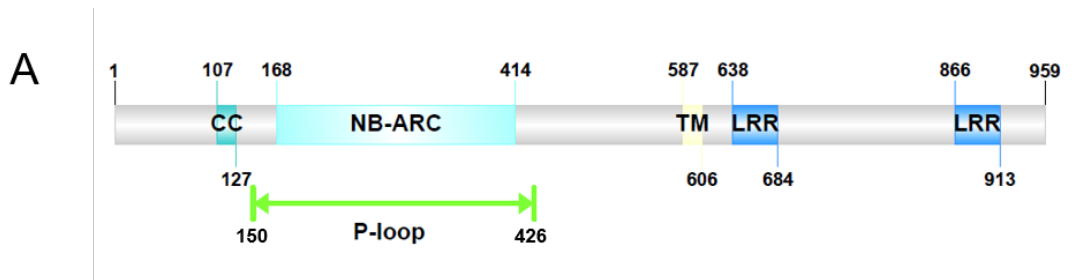

**B**

```

MDFSAVSYALETIDKLTQEVTSLWGVDEQVGGGLASELRWMQSFLLKQVADARKVDHEVIRTTVVEIRELAYDAED
VIETFSLKVASKRKGFEFSNCIKRSACFLKEGCLLHQIKSEIEKITARIKVLTRQLKTYDVSKLGVGDGEGPSSSTER
REARRPYPHVMDDNIVGLGKDIEKLVSVLVDEESECKVLSICMGGLGKTTLAKKIYSQSQVVGHFHKLAWAY
VSQNCQKRKVVWEDILSDFNLLSEADKMKVKEKLAEKLSFFLEENKCLVVLDDIWNTEWSDSLKPAFSARETRS
KILLTSRNKEIVSHADSKGFLYELQYLNKQSWELFQKIAFPPTNSPGYKIDAKMKELGEEMVKHCAGLPLAIIIL
GGILATKYPVSLIEWLKVSAVKSYLNNNDKGEVLRDVLALSYYDDLPPYLRPCFLYLSHFPEDEYIIPADRLIQLWVA
EGIVSSKQEEGEEGQVAEDVAEGYLLAERCMIQVREERDIATLKIRSFQMHDLMRDVCLSKAKQKFLYIAD
QSNACQLSTIGRVRVSAHKFIPLQCIKSPRLRSLLLFDELLPDEEQANIFPLTMQSYFDNHDFDNPPLYWVAVAP
LMLSVVFTKFRGIWKYMFNNFNFLRVLDYEGGGEAGCKLPNDIGKLIHLRFLRLRDLEFLSSKLPSSLGNLRLCL
QTLDLRIEGGCSNSIHPVNLWRMQLRHLYLPEECNRKTKLKLGLTRNLQTLVNFNTKNCYVKDLINMTNIRE
LEIRGPFNIEDCNTGELDKNPPIIHSKYLHSLIINEEGIIDPRHLAHLALLSCENISKLRLDVEIRRLPEYHYLSSNLA
YIKLRRCKLEEDPMPTLAELPYLSMLELHEEAFIGKEMFCSGQAFKLESLSLKGFLNLEEWKVSSEEGAMPCL
RRLEIENCIQLKLLPDGLRFIATLQELKIESMPTTFKDKVVEEGGEDFCVVRHVPSIIVDARFSSIL
  
```

**Figure S7. Protein coding sequence and protein domain structure of Gh\_D11G2949.** (A) Protein domain structure of Gh\_D11G2949. CC: Colied-coil domain, TM: Transmembrane. (B) Protein coding sequence of Gh\_D11G2949.

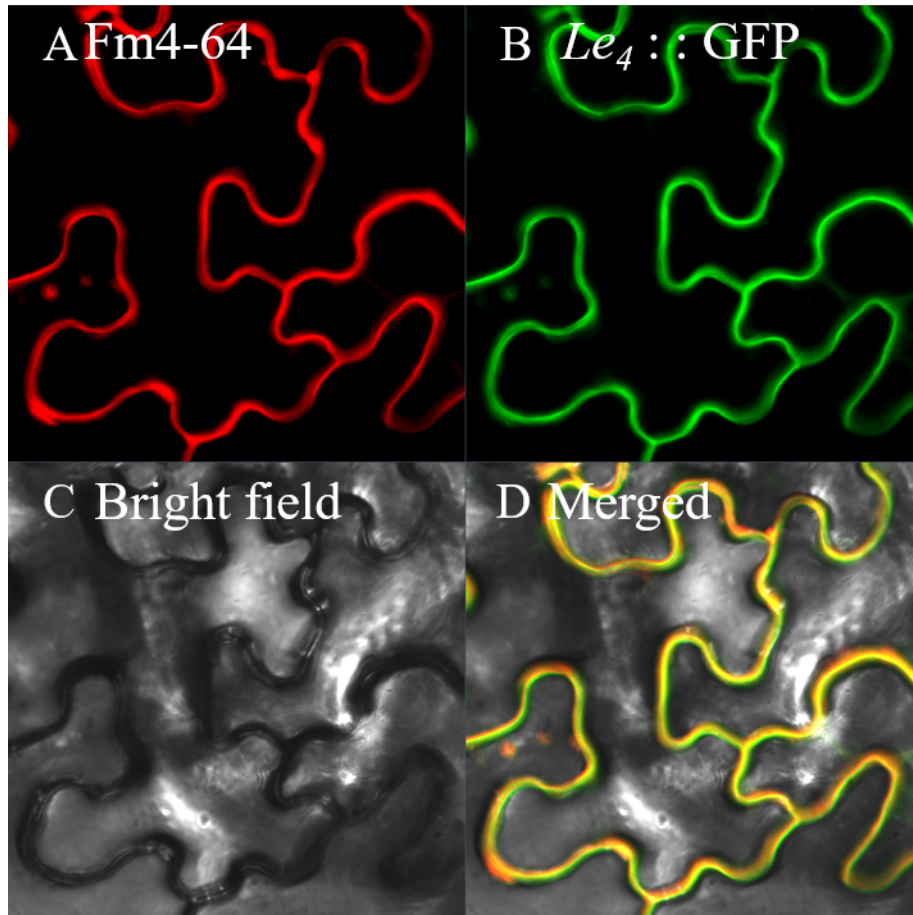

**Figure S8. Subcellular localization of *Le4*(Gh\_D11G2949).** Subcellular localization of *Le4*::GFP of *Nicotiana benthamiana* leaf epidermal cell. FM4-64 dye the cell member (red), overlap with *Le4*::GFP.



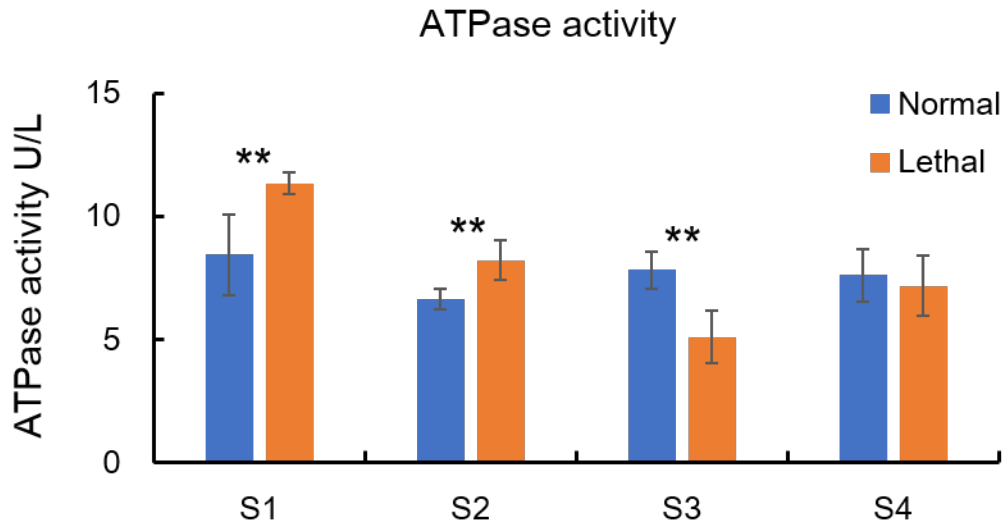

**Figure S9. ATPase activity between normal and lethal F<sub>1</sub>s in leaves from four different developmental stages.** ATPase concentration was significant different higher in lethal F<sub>1</sub> than in normal F<sub>1</sub> in S1 and S2.

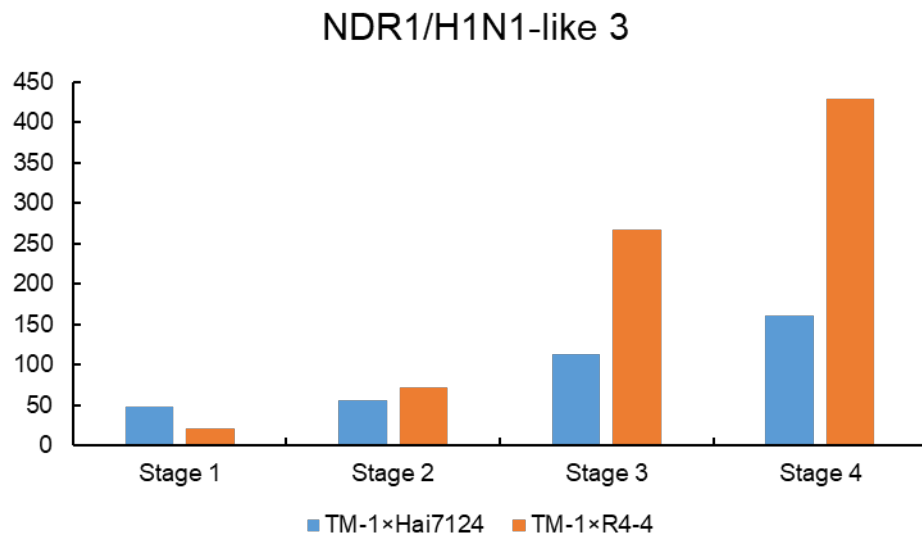

**Figure S10.** FPKM value of *NDR1/H1N1-like 3* gene. *NDR1/H1N1-like 3* gene up-regulated after stage 2 in lethal F<sub>1</sub>.

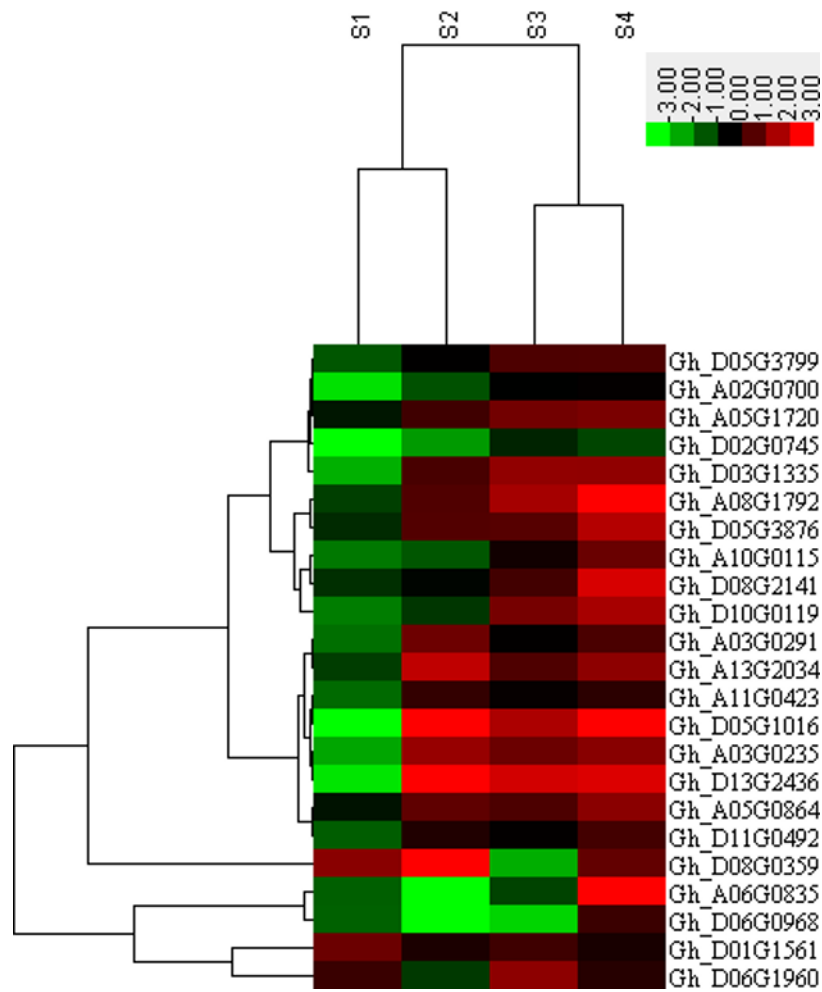

**Figure S11 Heatmap of differential expressed *MAPK/MAP2K/MAP3K* genes in the four stages.** The quantitative changes in expression are shown in red (indicating up-regulation) and green (indicating down-regulation) in lethal F<sub>1</sub>.

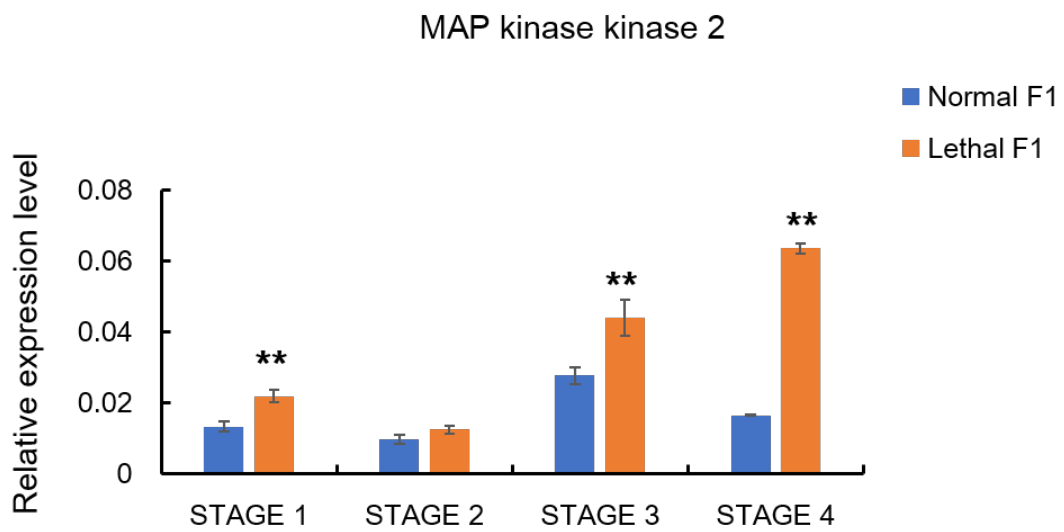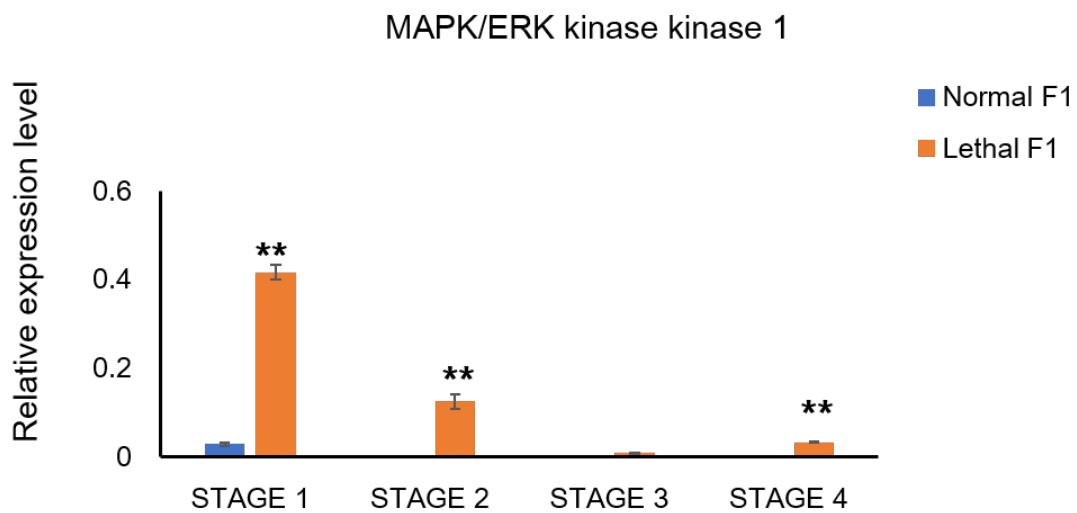

**Figure S12. qPCR of *MAPKs* genes.** qPCR analysis conformed the *MAPK/MAPKK/MAPKKK* genes transcriptome analysis results. *MAPKs* genes up-regulated in lethal F<sub>1</sub> plants.

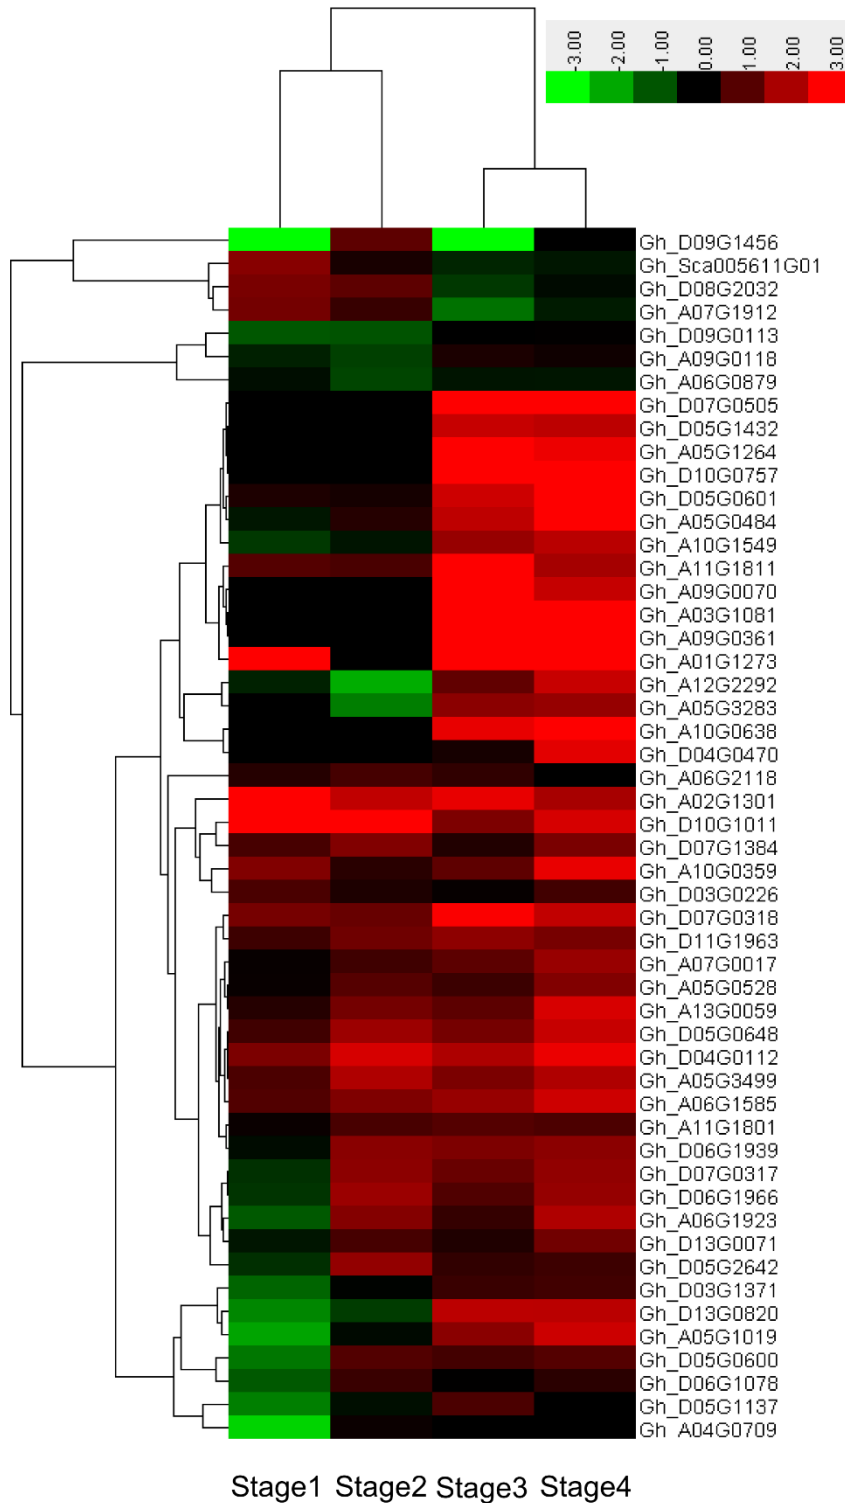

**Figure S13. Heatmap of differentially expressed *WRKY* TFs in the four stages.** The quantitative changes in expression are shown in red (indicating up-regulation) and green (indicating down-regulation) in lethal F<sub>1</sub>.

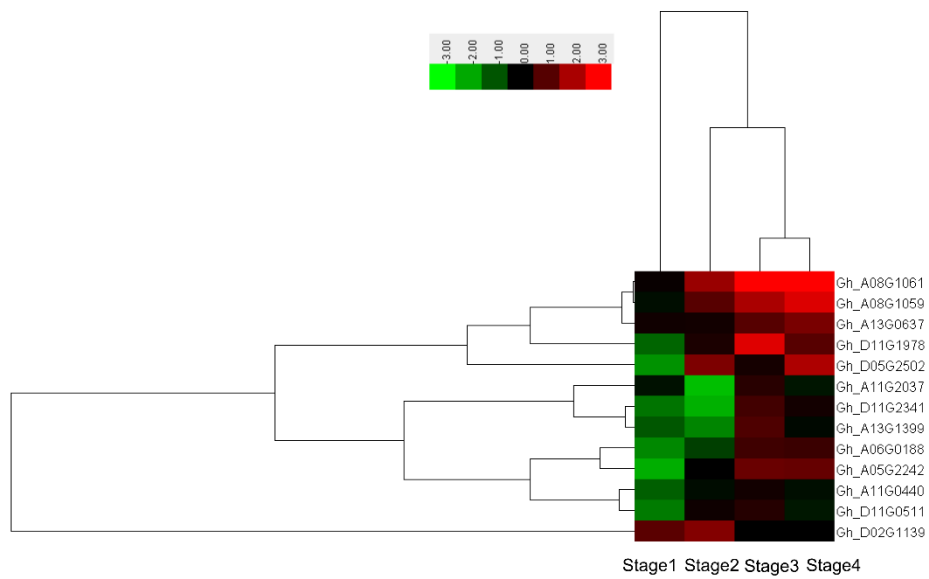

**Figure S14. Heatmap of differentially expressed *MYB* TFs in the four stages.** The quantitative changes in expression are shown in red (indicating up-regulation) and green (indicating down-regulation) in lethal F<sub>1</sub>.

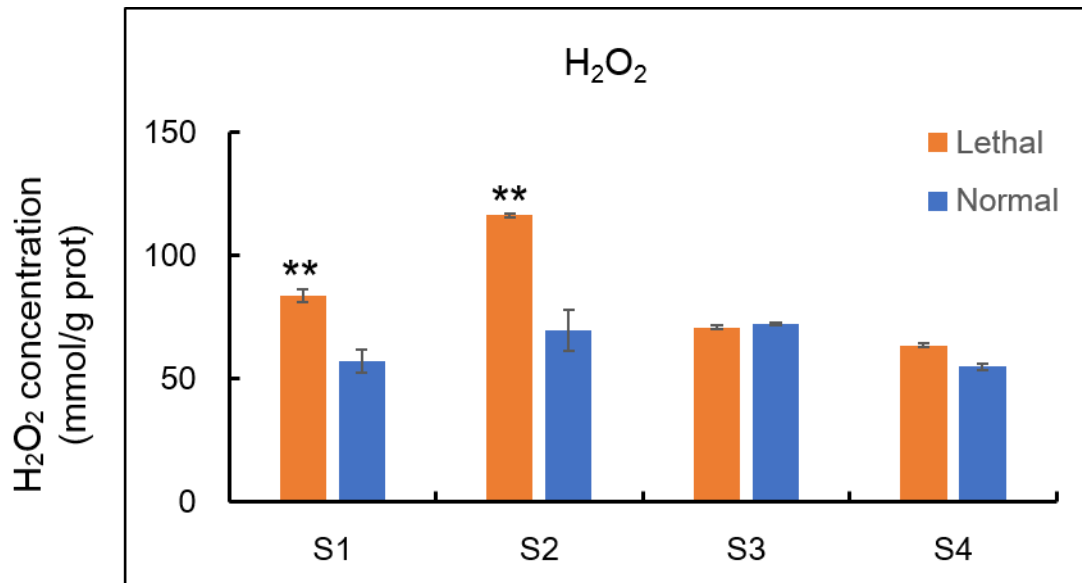

**Figure S15. H<sub>2</sub>O<sub>2</sub> concentration in lethal and normal F<sub>1</sub>s in the four stages. Lethal F<sub>1</sub> had higher H<sub>2</sub>O<sub>2</sub> concentration than normal F<sub>1</sub> in early stages.**

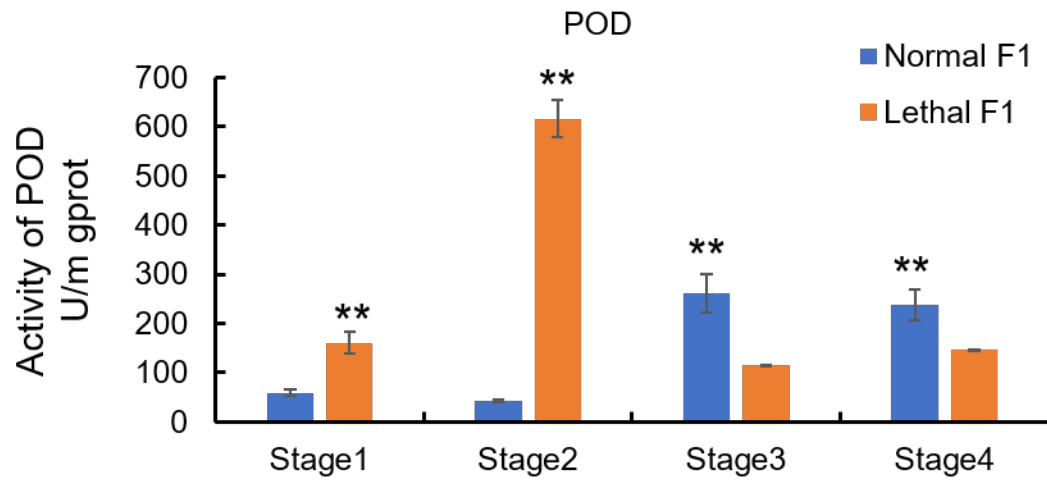

**Figure S16. Activity of POD in lethal and normal F<sub>1</sub>s in the four stages.** Lethal F<sub>1</sub> plants had higher POD activity in early stages, especially in S2.



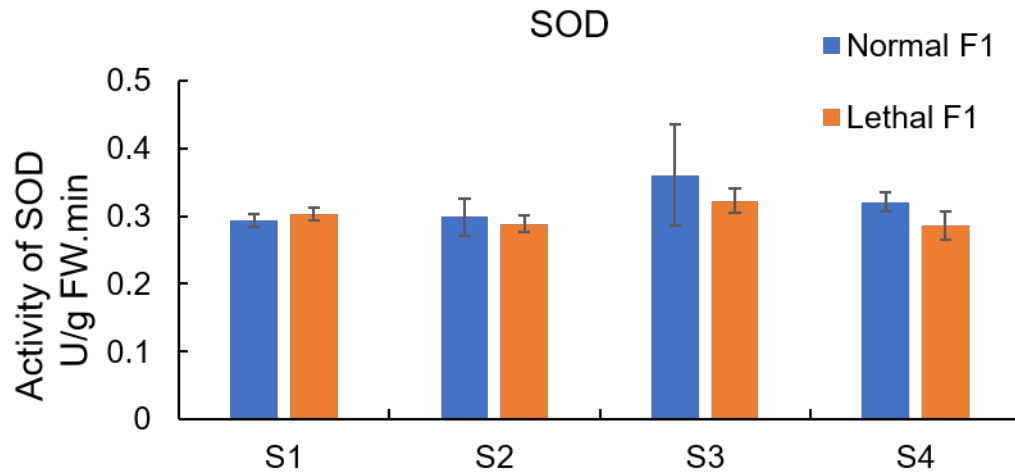

**Figure S17. SOD activity in normal and lethal F<sub>1</sub>s in the four stages.** There was no difference between normal and lethal F<sub>1</sub>s in any stage.
